```

Hydractinia_Nanos2      -PLVHSNTPQVPPRSSTS-----LQVCVFCRNNG-----ESESVYTSHVLK 40
Clytia_Nanos2          -PLPPS-QPQNRGASTNSNNNGVQVCVFCRNNG-----ESESVYTSHVLK 44
Hydra_cnno2           -TLYNS-HDSLTLRASN-----VCVFCRNNG-----ESENVYASHVLK 37
Nematostella_nanos2  --LGKP-TARSSAPGANR-----QVCVFCRNNG-----ESEEVYASHVLK 37
Hydra_cnno1          --QQIQSKALKNLKTS-----VCVFCRNNG-----ESREFYSSHTLK 37
Hydractinia_Nanos1   --PPLSKDSRLSKANKTT-----VCVFCRNNG-----ESKEFYSSHTLK 37
Clytia_Nanos1        --PFHSSHHRKNAAKAT-----VCVFCRNNG-----ESREFYSSHTLK 37
Nematostella_nanos1  ---NRENKKNRAN-----VCVFCRNNG-----ESKVVYSSHTLK 32
Ephydatia_nanos      ---TFSKLPQQPIKQQ-----VCVFCRNNG-----ESESFYTSHYLK 36
Mus_nanos1           ---ARLLKPELQV-----CVFCRNNK-----EVALYTTHTLK 30
Homo_nanos1          ---ARLLKPELQV-----CVFCRNNK-----EAMALYTTHTLK 30
Xenola_xcat2        ---ESVGHKG-----CGFCRSNR-----EALSLYTSRHLR 27
Homo_nanos3          -----ESSAPER-----LCSFCKHNG-----ESRAIYQSHVLK 29
Mus_nanos3           -----ESSAPER-----LCSFCKHNG-----ESRAIYQSHVLK 29
Danio_nanos          -----PKSSPAERK-----FCSFCKHNG-----ETEAVYTSHYLK 30
Homo_nanos2          -----PGANGGLT-----LCNFCCKHNG-----ESRHVYSSHTLK 30
Mus_nanos2           -----EGYPGCLPT-----ICNFCCKHNG-----ESRHVYSSHTLK 30
Platynereis_nanos    LLLTIITRSKHKAPTGKKN-----ICVFCCKTNG-----EGEVIYTSHTLK 39
Botryllus_nanos     ALLPSSPNARTQILPVAR-----FIGCSFCKNNK-----EVKEVYMSHTLK 41
Dugesia_nanos        --LLHKVRTS-NQIRKESH-----IELCVFCRNNN-----EPFEMYVSHVKV 39
Haliotis_nanos      --RGDVTQLQVQKSKK-----LICVFCCKNNK-----EPHVVYTGHTLK 38
Helobdella_nanos    ---GKSGEPAL-----VCVFCRNNK-----EPECVANSHLVK 29
Drosophila_sim_nanos ---YKRYN-SKAKEIS-----RHCVFCENNN-----EPEAVINSHSVR 34
Drosophila_nanos    ---YKRYN-SKAKEIS-----RHCVFCENNN-----EPEAVINSHSVR 34
Musca_nanos          ---QKRYNGPKNEKYSS-----AKHCVFCENNN-----EPDAVVKSHAVR 37
Chironomus_nanos    ---KKMDKNSIKKKMD-----DHCVFCCKNNG-----ADEILYKSHTVK 37
Anopheles_nanos     ---KCRN-KSTCELD-----HCVFCFNK-----ADREVVYSHRCK 32
Celegans_nanos1     ---PRGNPPHFLC-----CCFCFGTASEFARLHTLPAPRKDRGWPMSDHCSK 44
Celegans_nanos2     ---VPSLFKRREYG-----CGYCRSVG-----YMRWETHTRK 29

```

```

Hydractinia_Nanos2      DTEGRTACPILRAYT-CPICKANGDGSHTIKYCPNLQNTN-----AGVMGQP- 87
Clytia_Nanos2          DTDGRTSCPILRAYT-CPICKANGDNSHTIKYCPMNQARMGQNGNNGNAGLFFRPPF 103
Hydra_cnno2           DTDGRTSCPILRAYT-CPICKANGDNSHTIKYCPMNQAR-----SASTFNGLS- 85
Nematostella_nanos2  SADGKTTCPILRAYT-CPICKASGDDSHTIKYCPNQQTQ-----GNGQLPPFP- 85
Hydra_cnno1          DNEGNTMCPILRAYT-CPLCKSHGNQSHTIKYCPKYTKPK-----KTDKLLGIS- 85
Hydractinia_Nanos1   DNEGNTTCPILRAYT-CPLCKANGDNSHTIKYCPKYTKPK-----KADKLLGIS- 85
Clytia_Nanos1        DSEGNTSCPILRAYT-CPLCKANGDSSHTIKYCPKYTKPKV-----KAEKLLHLN- 85
Nematostella_nanos1  DAEGNTTSCPILRAYT-CPLCKASGQSHTIKYCPKNKNGS-----KLQAKV- 77
Ephydatia_nanos      DAEGKVTCPVLRAYT-CPLCGANGDAHTIKYCPENSQSV-----RNGIGKRQ- 84
Mus_nanos1           GPDGRVLCVLRRYT-CPLCGASGDAHTIKYCPKSKVPPPTVRP-----PPRSNRDLSL 84
Homo_nanos1          GPDGRVLCVLRRYT-CPLCGASGDAHTIKYCPKSKVPPPPARP-----PPRSARDGPP 84
Xenola_xcat2        ALDGRVLCVLRGYT-CPLCGANGDAHTIMRYCPLRRLRD-----PQSNNSNP- 75
Homo_nanos3          DEAGRVLCPILRDYV-CPQCGATREHAHTRRFCPLTQGYTS-----VYSHTTRNSA 80
Mus_nanos3           DEAGRVLCPILRDYV-CPQCGATQEAHTRRFCPLTQGYTS-----VYCYTTRNSA 80
Danio_nanos          NRDGDVMCPYLRQYK-CPLCGATGAKAHTKRFCPMVDKNYCS-----VYAKSTW- 78
Homo_nanos2          TPDGVVVCPILRHYV-CPVCGATGDAHTLKYCPLNGG-QQS-----LYRRSRGNSA 80
Mus_nanos2           TPEGVVVCPILRHYV-CPLCGATGDAHTLKYCPLNNS-QQS-----LYRRSRGNSA 80
Platynereis_nanos    EKNGRVCCPILRAYK-CPNCGAGHDAHTLKYCPLSVENQKR-----LRRPPGFIF- 89
Botryllus_nanos     NNAGKVTCVLRQYE-CPLCEATGDAHTIGHCPLNPNRHS-----LPLAIRSKAN 92
Dugesia_nanos        DLNGKVTCVLRNYT-CPLCNSTGDAHTIKYCPISNSKSS-----LVE----- 83
Haliotis_nanos      DSRGYTACVLRKYP-CPICQATGDAHTIKYCPNNDSEFR-----TSPLRTRM 90
Helobdella_nanos    DEKGQVTCPILYIYT-CPICGATGKAHTIKYCPYNTGERFYVPP-----LTRKTGNRSQ 83
Drosophila_sim_nanos DNFNRVLCPKLRTYV-CPICGASGDAHTIKYCPKPKIIT-----MEDAIKAESF 83
Drosophila_nanos    DNFNRVLCPKLRTYV-CPICGASGDAHTIKYCPKPKIIT-----MEDAIKAESF 83
Musca_nanos          DSMGRVLCPKLRTYI-CPICKASGDKAHTVKYCPKPKIIT-----MEDAVNAESF 86
Chironomus_nanos    DLKGRVLCPKLRAYQ-CPICGADGQSHTVKYCPKPKIIVT-----MEDLKKLDAS 86
Anopheles_nanos     DEAGNVTCVPLQTFV-CMRCKATGTAHTAKYCPKPKIIT-----PEDCLAME- 79
Celegans_nanos1     K-RGRVVCVPLRSMV-CGICGATGDAHTTKHLEAFGDD-----EDFSRDFENRRF 82
Celegans_nanos2     K-----CDKLSLAPCKICGARGEMNHTETCYCPMKPSSQLFFN-----EDFSRDFENRRF 79

```

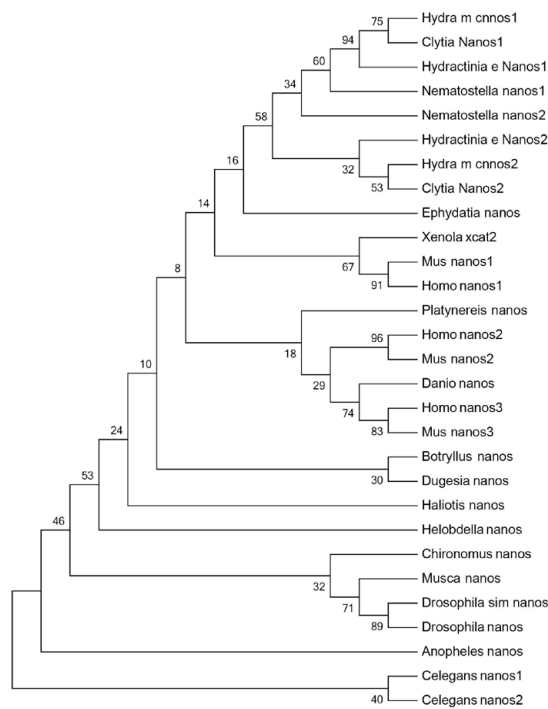

Fig. S1. Alignment of Nanos proteins from various animals and inferred phylogenetic tree. Bootstrap values are given.

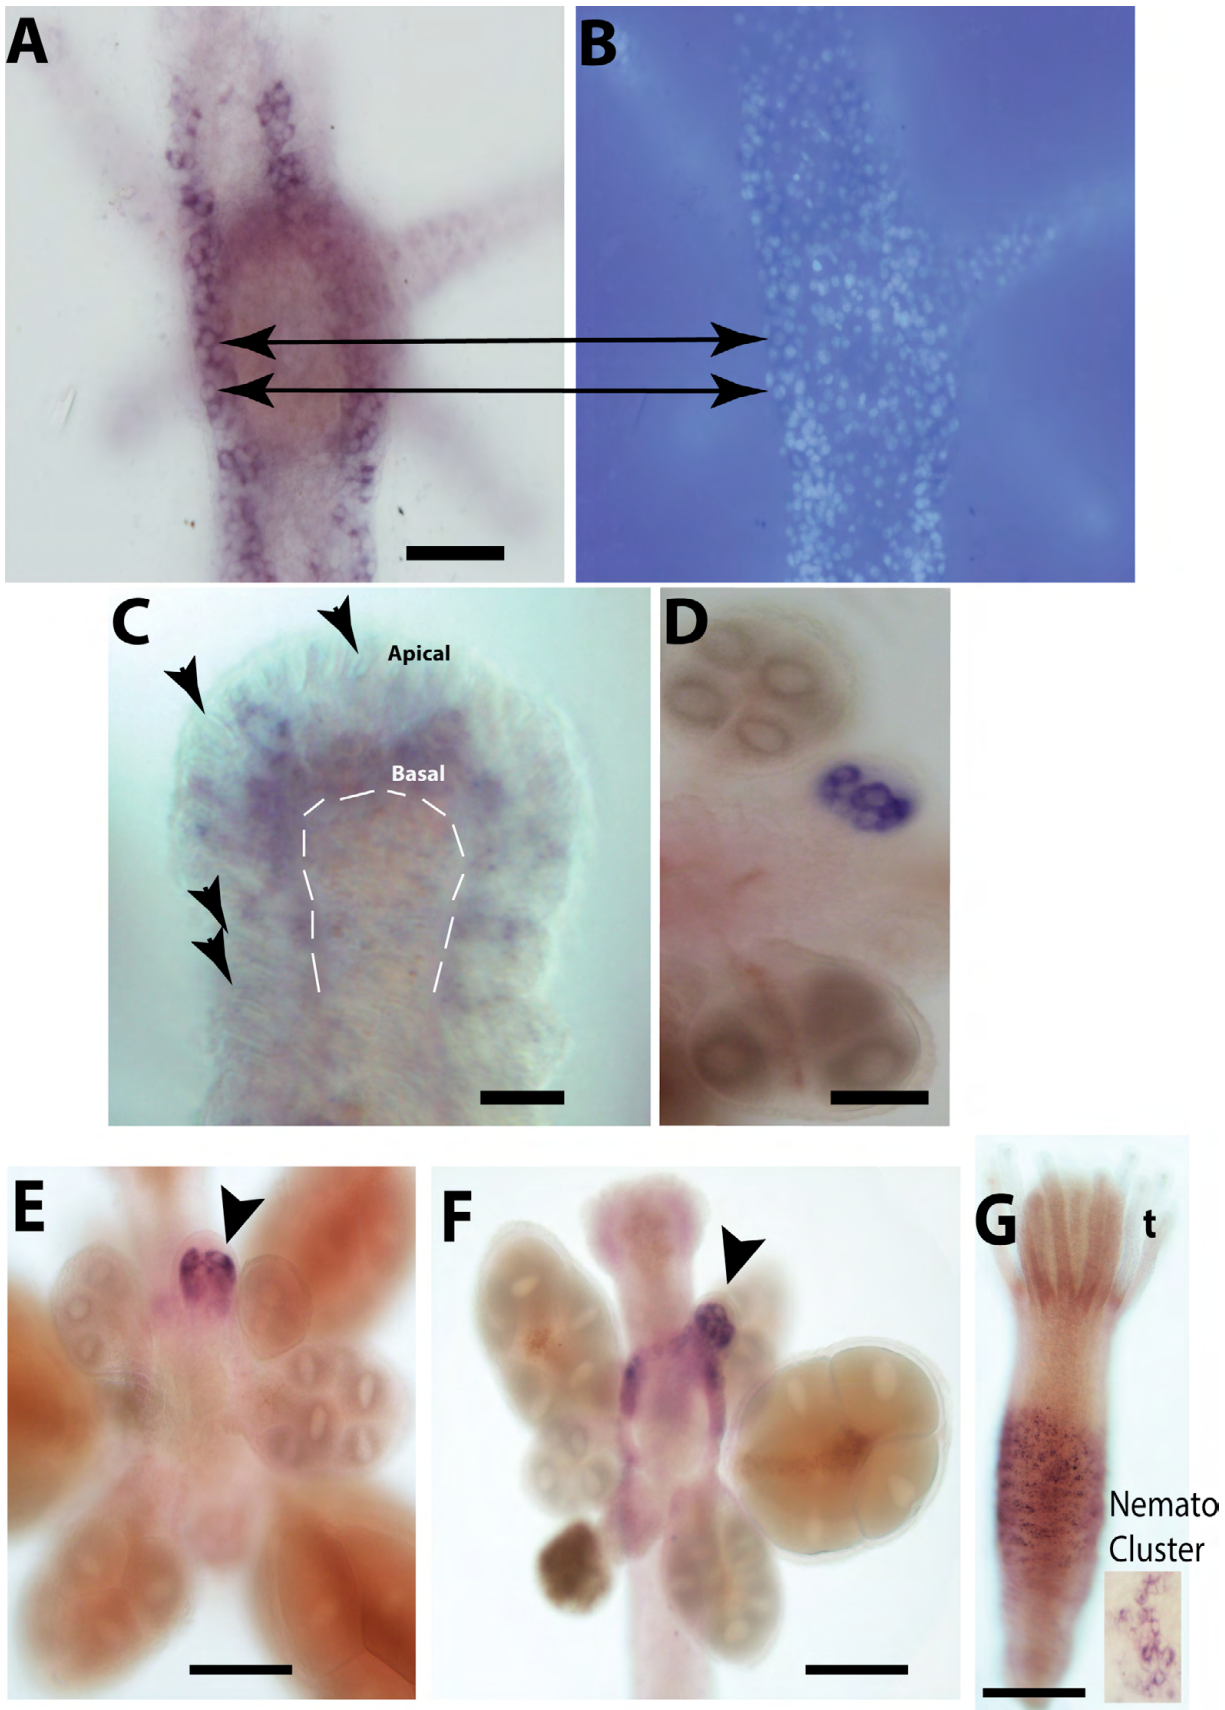

Fig. S2. *Nanos2*, *Nanos1* and *Pumilio* expression. (A-D) *Nanos2*. (A) Stolon of primary polyp, viewed from below; bright light. (B) The same animal as (A) but under UV light showing DAPI positive nuclei. Double headed arrows point to the same cells. (C) A tentacle. Mature nematocytes, apically mounted in battery cells and ready to discharge, are marked by arrows. *Nanos2*<sup>+</sup> cells are only basally located. Dashed line represents the position of the mesoglea. (D) Sexual polyp. *Nanos2*<sup>+</sup> developing oocytes are visible. (E) *Nanos1* expressing oocytes. (F) *Pumilio* expression in oocytes. (G) *Pumilio* expression in nematoblasts in a mature feeding polyp. Inset shows nematoblasts cluster. Scale bars 50  $\mu$ m in (A); 10  $\mu$ m in (C); 200  $\mu$ m in (D-G).

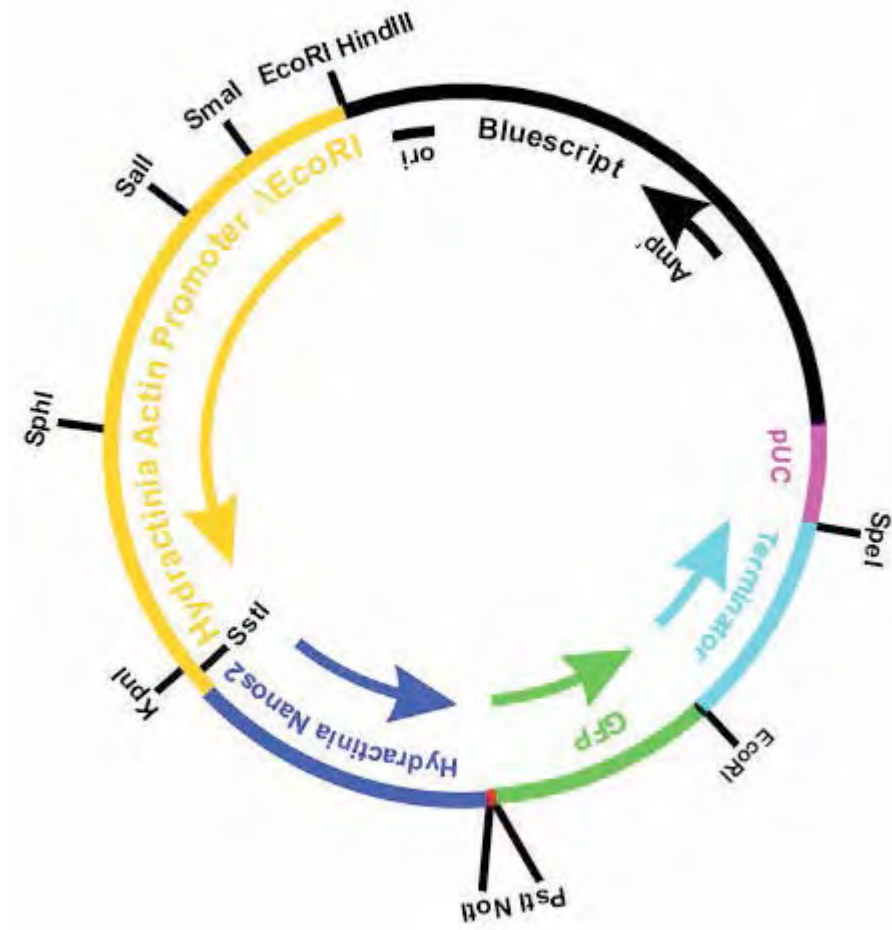

Fig. S3. Structure of the *Nanos2* ectopic expression construct.

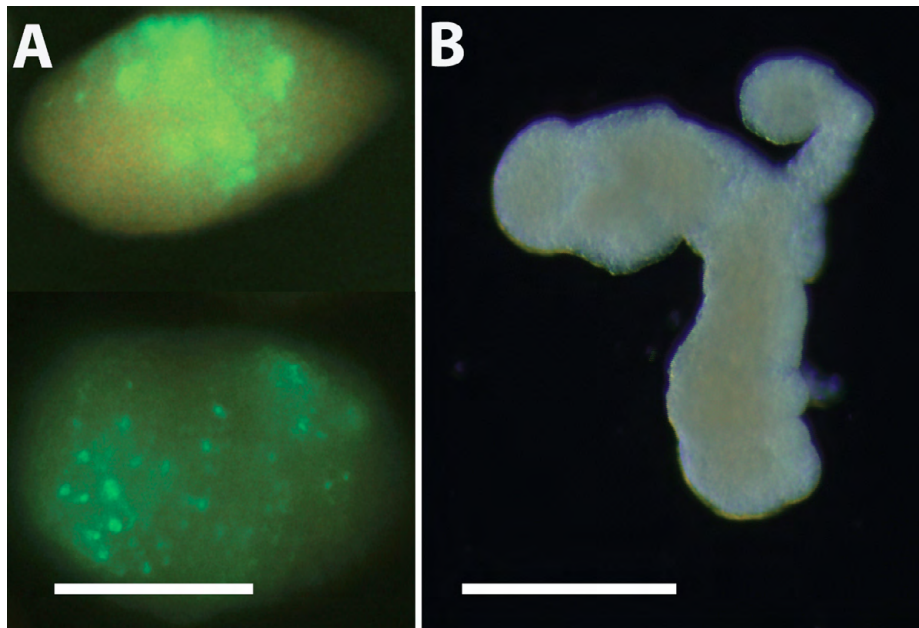

Fig. S4. (A) Transgenic, mosaic larvae expressing *Nanos2*-GFP. Scale bar represents 100  $\mu$ m. (B) Aberrantly developed transgenic *Nanos2* embryo. Scale bars 100  $\mu$ m.

Table S1. Oligonucleotides used during the study

| Oligo name                    | Oligo sequence                                      |
|-------------------------------|-----------------------------------------------------|
| Nanos1ATG-T7-fwd              | gatcataatcgactcactatagggatgttcaaggcaatgtatagcaatgtt |
| Nanos1Sp6-rev                 | tagcaatttagtgacactatagaaggtgttttggccttagacaat       |
| Nanos2fwd-ATG                 | atgtcgttgagtgatgttatgcta                            |
| Nanos2revRNAi                 | aatcctgaataaggaaaaatcacttgc                         |
| Nanos2fwdRNAiT7               | ggatcctaatacgactcactatagggatgtcgttgagtgatgttatgc    |
| Nanos2revRNAisp6              | gatcctaatttagtgacactatagaaaatcctgaaataaggaaaaatc    |
| Nanos2revpro1                 | tatgcccgccactcttcttagaaattcttttcaacaacaa            |
| Nanos2rev-TAA                 | catcctaaccttccatgctggtt                             |
| Nanos2-RT-fwd2                | acagcaaatcaacagccgaat                               |
| Nanos2-RT-rev2                | gaaggcgttgcagga                                     |
| Nanos2promoterrev-NotI        | tatgcccgcccttcttagaaattcttttcagcaac                 |
| Promoter_insertionUFPrev-FseI | aatggccggcactggcctgttttcaaca                        |
| Nonos2promoterfwd-FseI        | taaggccggccttctgtgttgctggtg                         |
| Splinkerout                   | cgaatcgtaaccgttcgtacgagaa                           |
| Splinkerin                    | tctgacgaaatcgtctcctctcc                             |
| Ash-T7-fwd                    | gatcataatcgactcactatagggcaccgattaacaatgatgca        |
| Ash-sp6-rev                   | tagcaatttagtgacactatagaataacagcgaaataattacaatcta    |
| RFamide-T7fwd                 | gatcataatcgactcactatagggatgttaatcatggcttcaaggc      |
| RFamide-sp6rev                | tagcaatttagtgacactatagaacttaacagtcctctctctgtgttg    |
| Ncol1-T7 fwd                  | gatcataatcgactcactatagggcgtccaggaccaccaggagta       |
| Ncol1-Sp6 rev                 | tagcaatttagtgacactatagaactggcaacagatgtggacaaga      |
| Pumilionestrev1               | ggtcctgttccagttagaactgaagat                         |
| Pumilionestfwd1               | aagcattggagactataccaccagaa                          |
| Pumilio ATG start fwd         | atgctcgacatcttggcaaca                               |
| Pumilio RACE rev1             | ggattcttccaatgatttcaaaagtaaacat                     |
| Pumilio stop-TGA-rev          | aactctcaatcaacatagaacgttcagc                        |
| Pumilio rev3                  | catttaacataggaataaccacatttgacc                      |
| PumilioRACE rev2              | ttcgaaactgagtagtttatccccag                          |
| Pumilio rev4                  | atgaaaagagttggtctctgattcat                          |
| Pumilio T7-fwd                | gatcataatcgactcactatagggatcggaggctccttcagctact      |
| Pumilio sp6-rev               | tagcaatttagtgacactatagaatacatgtattgtcatttctgggtgat  |
| T7 Promoter                   | taatacgactcactataggg                                |
| Sp6 Promoter                  | atttaggtagactatagaa                                 |
| pGEM-T RNAi Fwd               | ggcctttctcatgctcac                                  |
| pGEM-T RNAi Rev               | taccgggttgactcaagac                                 |
| pGEM-T RNAi fwd 2             | cgacaggactataaagataccaggc                           |
| T7pGEM-T RNAi fwd2            | atcctaatacgactcactatagggcagaggactataaagataccaggc    |
| GFP-TAGstop-rev               | ctattgtatgttcatccatgccat                            |
| Spliced leader                | actcacactatttcaagcctgag                             |
| Splice leader long            | aacgccccgagataaaaaaacacactatttcaagcctgagtttaag      |
| Smart UPM long                | ctaatacgactcactatagggcaagcagtggtatcaacgcagagt       |
| Smart UPM short               | ctaatacgactcactatagggc                              |
| Nanos2 morpholino             | gcataacatcctcaacgacattt                             |
| Control morpholino            | cctcttaccctcagttacaattata                           |
